# Supplementary material
Source: PubMed Central journal article supplement (PMC3001256)
Supplement: supp_182_9_1137__1.pdf [file supp_182_9_1137__1.pdf]

# **Location and Duration of Treatment of Cystic Fibrosis Respiratory Exacerbations do not Affect Outcomes**

**J. Michael Collaco, M.D., Deanna M. Green, M.D.,  
Garry R. Cutting, M.D., Kathleen M. Naughton, C.R.N.P.,  
and Peter J. Mogayzel, Jr., M.D., Ph.D.**

**ONLINE DATA SUPPLEMENT**

**Supplemental Figure 1.** Derivation of Study Population for Venue

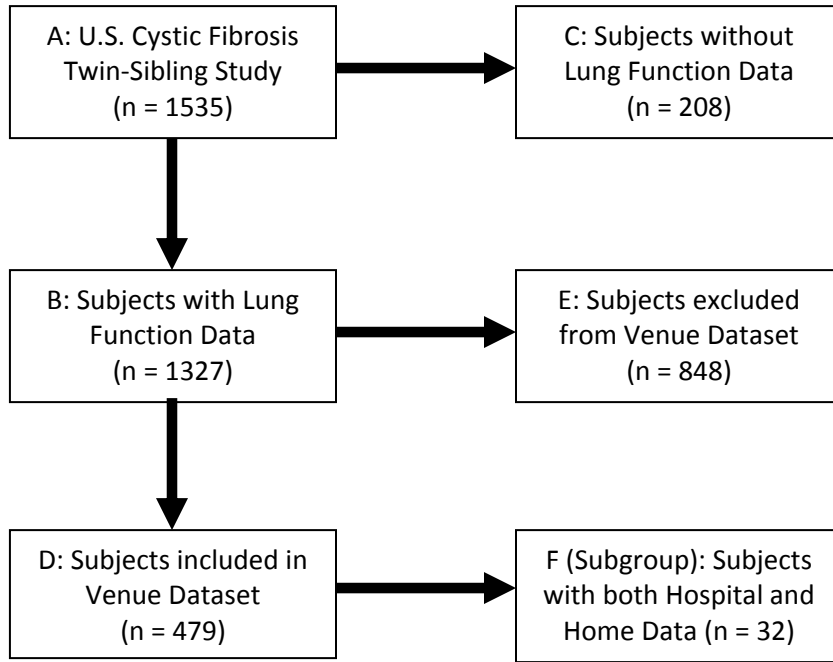

**Supplemental Figure 2.** Derivation of Study Population for Duration

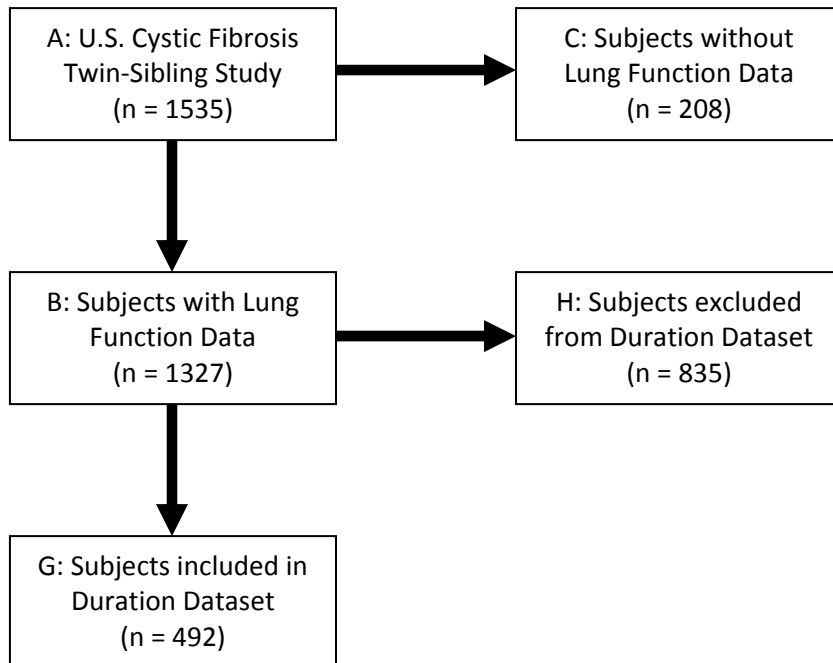

**Supplemental Table 1.** Demographics of Study Populations

|                                           | A<br>Twin-<br>Sibling<br>Study | B<br>Any lung<br>function<br>data <sup>1</sup> | C<br>No lung<br>function<br>data <sup>1</sup> | D<br>Venue of<br>Therapy<br>Group <sup>2</sup> | E<br>Excluded<br>from<br>Venue <sup>2</sup> | F<br>Subgroup<br>for<br>Hospital<br>vs. Home | G<br>Duration<br>of Therapy<br>Group <sup>3</sup> | H<br>Excluded<br>from<br>Duration <sup>3</sup> |
|-------------------------------------------|--------------------------------|------------------------------------------------|-----------------------------------------------|------------------------------------------------|---------------------------------------------|----------------------------------------------|---------------------------------------------------|------------------------------------------------|
| <b>n</b>                                  | 1535                           | 1327                                           | 208                                           | 479                                            | 848                                         | 32                                           | 492                                               | 835                                            |
| <b>Age (yrs)<sup>4</sup></b>              | 16.3 ± 11.6                    | 17.3 ± 9.2                                     | 10.3 ± 20.3                                   | 19.4 ± 8.3                                     | 16.1 ± 9.5                                  | 22.1 ± 7.22                                  | 19.2 ± 8.4                                        | 16.1 ± 9.4                                     |
| <b>Gender<br/>(% Male)</b>                | 51.8<br>(n=1534)               | 52.2                                           | 49.8<br>(n=207)                               | 47.4                                           | 54.8                                        | 75.0                                         | 49.2                                              | 53.9                                           |
| <b>CFTR<br/>(% DF508<br/>homozygotes)</b> | 49.3<br>(n=1524)               | 49.2<br>(n=1323)                               | 49.8<br>(n=201)                               | 49.2<br>(n=478)                                | 49.2<br>(n=845)                             | 40.6                                         | 50.1<br>(n=491)                                   | 48.7<br>(n=832)                                |

<sup>1</sup> Comparing groups B and C: Age *t* test *p* value<0.0001, gender chi square=0.52, *CFTR* chi square=0.89.

<sup>2</sup> Comparing groups D and E: Age *t* test *p* value<0.0001, gender chi square=0.009, *CFTR* chi square=0.98.

<sup>3</sup> Comparing groups G and H: Age *t* test *p* value<0.0001, gender chi square=0.10, *CFTR* chi square=0.62.

<sup>4</sup> Age is calculated from the last pulmonary function test used in the study or from 12/31/2007 for subjects without pulmonary function test data.

**Supplemental Table 2.** Means and Confidence Intervals for Lung Function Measures by Group for Figures 2 and 3

| Category               | Group                           | n   | Baseline FEV <sub>1</sub> | Pre-therapy FEV <sub>1</sub> | Post-therapy FEV <sub>1</sub> | New Baseline FEV <sub>1</sub> |
|------------------------|---------------------------------|-----|---------------------------|------------------------------|-------------------------------|-------------------------------|
| Venue<br>(Figure 2)    | Hospital Only                   | 602 | 67.4<br>[65.6, 69.2]      | 58.8<br>[57.0, 60.5]         | 67.9<br>[66.1, 69.8]          | 64.1<br>[62.3, 66.0]          |
|                        | Home Only                       | 232 | 65.1<br>[62.2, 67.9]      | 59.5<br>[56.6, 62.4]         | 64.4<br>[61.4, 67.5]          | 61.5<br>[58.5, 64.6]          |
|                        | Combination:<br>Hospital & Home | 444 | 71.4<br>[69.4, 73.3]      | 63.0<br>[61.0, 65.0]         | 72.0<br>[69.8, 74.1]          | 67.8<br>[65.6, 70.0]          |
| Duration<br>(Figure 3) | ≤7 days                         | 100 | 73.6<br>[68.4, 78.8]      | 64.3<br>[59.4, 69.2]         | 74.4<br>[69.3, 79.5]          | 70.9<br>[65.7, 76.2]          |
|                        | 8-14 days                       | 596 | 70.4<br>[69.7, 72.2]      | 61.6<br>[59.9, 63.3]         | 72.0<br>[70.2, 73.9]          | 67.6<br>[65.7, 69.4]          |
|                        | 15-21 days                      | 387 | 66.3<br>[64.1, 68.5]      | 59.1<br>[56.8, 61.3]         | 65.7<br>[63.4, 68.0]          | 62.6<br>[60.3, 64.9]          |
|                        | 22-28 days                      | 127 | 65.7<br>[62.3, 69.2]      | 59.5<br>[55.8, 63.2]         | 63.7<br>[59.9, 67.4]          | 60.2<br>[56.5, 63.9]          |
|                        | >28 days                        | 68  | 59.2<br>[54.2, 64.1]      | 52.7<br>[48.1, 57.4]         | 57.7<br>[52.7, 62.8]          | 55.2<br>[50.1, 60.2]          |

**Supplemental Table 3.** Predictive Models for Baseline Change (n = 832 therapy courses, 342 subjects)

| Regression Coefficient<br>(coefficient <i>p</i> value)                                                            | Univariate Models                 | Multivariate<br>Model*            | Final Model <sup>†</sup>          |
|-------------------------------------------------------------------------------------------------------------------|-----------------------------------|-----------------------------------|-----------------------------------|
| <b>Gender</b><br>(Female = 1, Male = 0)                                                                           | 0.06<br>(0.93)                    | 0.10<br>(0.89)                    | 0.05<br>(0.94)                    |
| <b>Number of CFTR F508del alleles</b><br>(0 - 2)                                                                  | -0.33<br>(0.57)                   | -0.23<br>(0.67)                   |                                   |
| <b>Age at start of therapy</b><br>(Years)                                                                         | -0.01<br>(0.78)                   | -0.06<br>(0.23)                   | -0.05<br>(0.28)                   |
| <b><i>P. aeruginosa</i> present</b><br>(Yes = 1; No = 0)                                                          | -1.32<br>(0.42)                   | -1.70<br>(0.39)                   |                                   |
| <b><i>B. cepacia</i> complex present</b><br>(Yes = 1; No = 0)                                                     | -0.58<br>(0.64)                   | -0.04<br>(0.97)                   |                                   |
| <b>Duration of therapy</b><br>(Days)                                                                              | <b>-0.11</b><br><b>(0.02)</b>     | <b>-0.15</b><br><b>(0.004)</b>    | <b>-0.15</b><br><b>(0.001)</b>    |
| <b>Baseline FEV<sub>1</sub></b><br>(Knudson percentage)                                                           | -0.03<br>(0.05)                   | -0.01<br>(0.50)                   |                                   |
| <b>FEV<sub>1</sub> drop prior to therapy (Sick Decline)</b><br>(Baseline FEV <sub>1</sub> – PreFEV <sub>1</sub> ) | <b>0.26</b><br><b>(&lt;0.001)</b> | <b>0.27</b><br><b>(&lt;0.001)</b> | <b>0.27</b><br><b>(&lt;0.001)</b> |
| <b>Location</b><br>(Home = 1, Hospital = 0)                                                                       | -0.30<br>(0.69)                   | 0.08<br>(0.91)                    |                                   |

\*Multivariate Model overall *p* value: <0.0001†Final Model overall *p* value: <0.0001; *r* = 0.36; residual kurtosis: 5.64.**Supplemental Table 4.** Predictive Models for Baseline Change (n = 832 therapy courses, 342 subjects)

| Regression Coefficient<br>(coefficient <i>p</i> value)                                                             | Univariate Models                 | Multivariate<br>Model*            | Final Model <sup>†</sup>          |
|--------------------------------------------------------------------------------------------------------------------|-----------------------------------|-----------------------------------|-----------------------------------|
| <b>Gender</b><br>(Female = 1, Male = 0)                                                                            | 0.06<br>(0.93)                    | 0.03<br>(0.96)                    | 0.07<br>(0.91)                    |
| <b>Number of CFTR F508del alleles</b><br>(0 - 2)                                                                   | -0.33<br>(0.57)                   | -0.11<br>(0.81)                   |                                   |
| <b>Age at start of therapy</b><br>(Years)                                                                          | -0.01<br>(0.78)                   | -0.04<br>(0.32)                   | -0.04<br>(0.35)                   |
| <b><i>P. aeruginosa</i> present</b><br>(Yes = 1; No = 0)                                                           | -1.32<br>(0.42)                   | -1.39<br>(0.37)                   |                                   |
| <b><i>B. cepacia</i> complex present</b><br>(Yes = 1; No = 0)                                                      | -0.58<br>(0.64)                   | -0.61<br>(0.58)                   |                                   |
| <b>Duration of therapy</b><br>(Days)                                                                               | <b>-0.11</b><br><b>(0.02)</b>     | -0.08<br>(0.08)                   | -0.07<br>(0.07)                   |
| <b>Baseline FEV<sub>1</sub></b><br>(Knudson percentage)                                                            | -0.03<br>(0.05)                   | -0.002<br>(0.91)                  |                                   |
| <b>FEV<sub>1</sub> drop prior to therapy (Sick Decline)</b><br>(Baseline FEV <sub>1</sub> – PreFEV <sub>1</sub> )  | <b>0.26</b><br><b>(&lt;0.001)</b> | <b>0.54</b><br><b>(&lt;0.001)</b> | <b>0.54</b><br><b>(&lt;0.001)</b> |
| <b>FEV<sub>1</sub> recovery with therapy (Immediate Recovery)</b><br>(PostFEV <sub>1</sub> – PreFEV <sub>1</sub> ) | <b>0.08</b><br><b>(0.02)</b>      | <b>0.38</b><br><b>(&lt;0.001)</b> | <b>0.37</b><br><b>(&lt;0.001)</b> |
| <b>Location</b><br>(Home = 1, Hospital = 0)                                                                        | -0.30<br>(0.69)                   | 0.32<br>(0.66)                    |                                   |

\*Multivariate Model overall *p* value: <0.0001

†Final Model overall  $p$  value: <0.0001;  $r = 0.54$ ; residual kurtosis: 5.19.

**Supplemental Table 5.** Predictive Models for Immediate Recovery (n = 832 therapy courses, 342 subjects)

| Regression Coefficient<br>(coefficient $p$ value)                                                                 | Univariate Models                  | Multivariate<br>Model*             | Final Model†                       |
|-------------------------------------------------------------------------------------------------------------------|------------------------------------|------------------------------------|------------------------------------|
| <b>Gender</b><br>(Female = 1, Male = 0)                                                                           | -0.27<br>(0.79)                    | 0.17<br>(0.81)                     | -0.04<br>(0.95)                    |
| <b>Number of CFTR F508del alleles</b><br>(0 - 2)                                                                  | -0.09<br>(0.91)                    | -0.32<br>(0.59)                    |                                    |
| <b>Age at start of therapy</b><br>(Years)                                                                         | <b>-0.23</b><br><b>(&lt;0.001)</b> | -0.04<br>(0.30)                    | -0.03<br>(0.43)                    |
| <b><i>P. aeruginosa</i> present</b><br>(Yes = 1; No = 0)                                                          | -1.82<br>(0.59)                    | -0.80<br>(0.64)                    |                                    |
| <b><i>B. cepacia</i> complex present</b><br>(Yes = 1; No = 0)                                                     | 1.85<br>(0.35)                     | 1.52<br>(0.20)                     |                                    |
| <b>Duration of therapy</b><br>(Days)                                                                              | <b>-0.33</b><br><b>(&lt;0.001)</b> | <b>-0.20</b><br><b>(&lt;0.001)</b> | <b>-0.21</b><br><b>(&lt;0.001)</b> |
| <b>Baseline FEV<sub>1</sub></b><br>(Knudson percentage)                                                           | <b>0.08</b><br><b>(&lt;0.001)</b>  | -0.02<br>(0.15)                    |                                    |
| <b>FEV<sub>1</sub> drop prior to therapy (Sick Decline)</b><br>(Baseline FEV <sub>1</sub> – PreFEV <sub>1</sub> ) | <b>-0.73</b><br><b>(&lt;0.001)</b> | <b>-0.72</b><br><b>(&lt;0.001)</b> | <b>-0.72</b><br><b>(&lt;0.001)</b> |
| <b>Location</b><br>(Home = 1, Hospital = 0)                                                                       | <b>-4.23</b><br><b>(&lt;0.001)</b> | -0.63<br>(0.46)                    |                                    |

\*Multivariate Model overall  $p$  value: <0.0001

†Final Model overall  $p$  value: <0.0001;  $r = 0.66$ ; residual kurtosis: 4.96.

**Supplemental Table 6.** Predictive Models for Baseline Change (n = 442 combination therapy courses, 247 subjects)

| Regression Coefficient<br>(coefficient $p$ value)                                                                 | Univariate Models                 | Multivariate<br>Model*            | Final Model†                      |
|-------------------------------------------------------------------------------------------------------------------|-----------------------------------|-----------------------------------|-----------------------------------|
| <b>Gender</b><br>(Female = 1, Male = 0)                                                                           | -1.06<br>(0.34)                   | -0.79<br>(0.45)                   |                                   |
| <b>Number of CFTR F508del alleles</b><br>(0 - 2)                                                                  | 0.03<br>(0.97)                    | -0.08<br>(0.92)                   |                                   |
| <b>Age at start of therapy</b><br>(Years)                                                                         | -0.02<br>(0.76)                   | 0.01<br>(0.93)                    |                                   |
| <b><i>P. aeruginosa</i> present</b><br>(Yes = 1; No = 0)                                                          | -3.41<br>(0.08)                   | <b>-4.11</b><br><b>(0.03)</b>     | <b>-4.42</b><br><b>(0.03)</b>     |
| <b><i>B. cepacia</i> complex present</b><br>(Yes = 1; No = 0)                                                     | -2.26<br>(0.19)                   | -1.77<br>(0.27)                   |                                   |
| <b>Duration of therapy</b><br>(Days)                                                                              | <b>-0.15</b><br><b>(0.03)</b>     | <b>-0.155</b><br><b>(0.03)</b>    | <b>-0.18</b><br><b>(0.01)</b>     |
| <b>Baseline FEV<sub>1</sub></b><br>(Knudson percentage)                                                           | 0.01<br>(0.82)                    | 0.01<br>(0.59)                    |                                   |
| <b>FEV<sub>1</sub> drop prior to therapy (Sick Decline)</b><br>(Baseline FEV <sub>1</sub> – PreFEV <sub>1</sub> ) | <b>0.28</b><br><b>(&lt;0.001)</b> | <b>0.29</b><br><b>(&lt;0.001)</b> | <b>0.29</b><br><b>(&lt;0.001)</b> |
| <b>Percentage of time spent in the hospital</b><br>(Days in Hospital/Total Days of Treatment)                     | -1.63<br>(0.46)                   | -0.71<br>(0.75)                   |                                   |

\*Multivariate Model overall  $p$  value: <0.0001

†Final Model overall  $p$  value: <0.0001;  $r = 0.34$ ; residual kurtosis: 4.18.
